# Supplementary material for: Effects of Soybean Oil Body as a Milk Fat Substitute on Ice Cream: Physicochemical, Sensory and Digestive Properties
Source: MDPI journal article supplement (doi:10.3390/foods11101504), 2022-05-22
Supplement: s1 [file s1]

# Effects of soybean oil body as a milk fat substitute on ice cream: physicochemical, sensory and digestive properties

Wan Wang <sup>1</sup>, Min Wang <sup>1</sup>, Cong Xu <sup>1</sup>, Zhijing Liu <sup>1</sup>, Liya Gu <sup>1</sup>, Jiage Ma <sup>1</sup>, Lianzhou Jiang <sup>1</sup>, Zhanmei Jiang <sup>1</sup> and Juncai Hou <sup>1,\*</sup>

<sup>1</sup> College of Food Science, Northeast Agricultural University, Harbin 150030, China; 13159806631@163.com (W.W.); 18246037810@163.com (M.W.); 15636116265@163.com (C.X.); liuzhijing22@126.com (Z.L.); Andrea\_hh@163.com (L.G.); jiage\_ma@neau.edu.cn (J.M.); jlzname@neau.edu.cn (J.L.); zhanmei-jiang@neau.edu.cn (Z.J.)

\* Correspondence: jchou@neau.edu.cn (J.H.); Tel.: +86-451-55190710

**Table S1.** Sensory scoring standard.

| Grade            | Color                                                         | Taste                                                               | Texture                                                          | Flavor                                            |
|------------------|---------------------------------------------------------------|---------------------------------------------------------------------|------------------------------------------------------------------|---------------------------------------------------|
| Excellent (8-10) | Uniform color, milky white, without variegation               | The delicate and lubricating taste, the moderate sweetness          | Complete, not collapsed, no obvious ice crystals                 | Rich milk flavor and bean flavor, no odor         |
| Good (6-8)       | Relatively uniform color, milky white, without variegation    | The finely lubricated taste, slightly sweet or light sweetness      | Relatively complete, slightly collapsed, no obvious ice crystals | Milk flavor and bean flavor, a little odor        |
| Moderate (4-6)   | Uneven color, milky white, slightly mixed color               | Not delicate and lubricated taste, too sweet or light sweetness     | Relatively complete, slightly collapsed, a little ice crystals   | A little milk flavor and bean flavor, slight odor |
| Poor (2-4)       | Uneven color, deep or shallow milky white, obvious variegated | Not delicate and not lubricated taste, too sweet or light sweetness | Not complete, collapsed, lots of ice crystals                    | No milk flavor and bean flavor, obvious odor      |
